# Supplementary material for: Bioactive Molecules Derived from Plants in Managing Dengue Vector Aedes aegypti (Linn.)
Source: MDPI journal article supplement (doi:10.3390/molecules28052386), 2023-03-05
Supplement: s1 [file s1]

## Supplementary Material

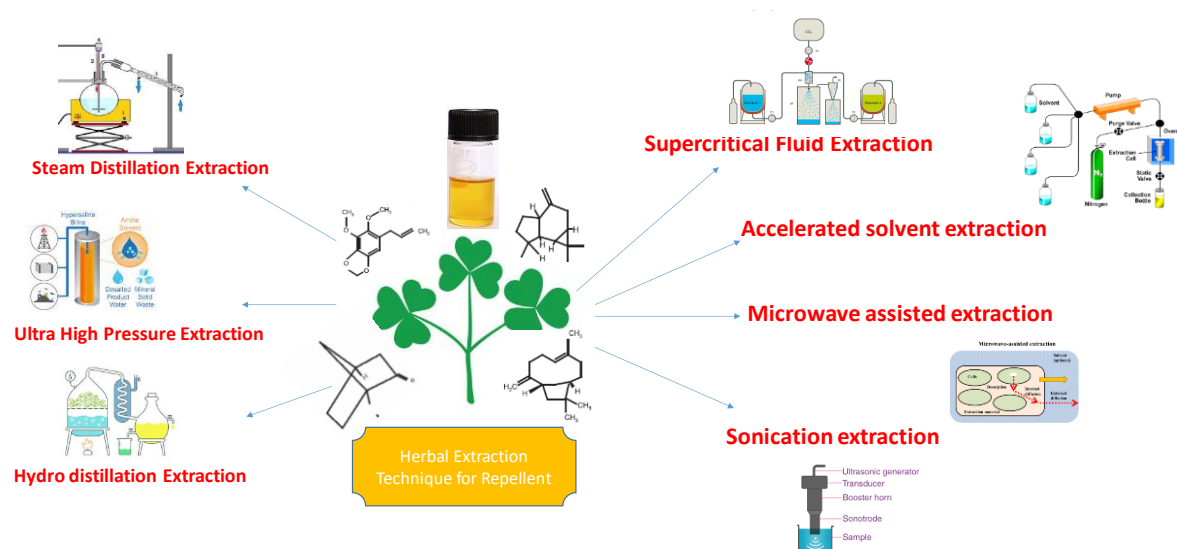

**Figure S1.** Different extraction process for plant repellent substances.
